# Supplementary material for: Mechanically stimulated osteocytes maintain tumor dormancy in bone metastasis of non-small cell lung cancer by releasing small extracellular vesicles
Source: eLife journal article supplement (doi:10.7554/elife.89613), 2023-08-24
Supplement: fig1-data1 [file Figure 1–Source Data 1.xlsx]

## Sheet: Sheet1
Figure 1. Osteocytes inhibit the proliferation of NSCLC cells.
a. Representative immunohistochemical staining and quantification of Ki-67 in bone metastasis site of patients with NSCLC.
	Surrounding cells	Adjacent cells
#1	41.789	22.08
#2	38.662	17.166
#3	32.556	8.651
#4	39.417	15.064
#5	48.837	10.038
#6	53.831	13.223
b. Representative immunohistochemical staining and quantification of Ki-67 in tibia of tumor-bearing nude mice.
	Surrounding cells	Adjacent cells
#1	69.197	15.543
#2	57.365	21.939
#3	71.894	37.015
#4	42.646	29.732
#5	61.379	36.699
#6	53.514	23.685
d. CCK-8 assays were performed to evaluate the effects of MLO-Y4 cells, MC3T3-E1 or NCM460 cells on the proliferation of A549 cells in the co-culture system.
	Control	Co-MLO-Y4	Co-MC3T3-E1	Co-NCM460
#1	1.539	0.938	2.007	1.538
#2	1.445	0.961	1.955	1.455
#3	1.428	0.958	1.973	1.51
#4	1.507	0.928	1.993	1.499
#5	1.531	0.946	2.018	1.473
#6	1.507	0.928	1.976	1.527
f. CCK-8 assays were performed to evaluate the effect of MLO-Y4 cells on the proliferation of MC3T3-E1 cells in the co-culture system.
	Control	Co-MLO-Y4
#1	1.181	1.501
#2	1.125	1.49
#3	1.122	1.508
#4	1.089	1.413
#5	1.086	1.499
#6	1.124	1.441
