# Supplementary material for: Mechanically stimulated osteocytes maintain tumor dormancy in bone metastasis of non-small cell lung cancer by releasing small extracellular vesicles
Source: eLife journal article supplement (doi:10.7554/elife.89613), 2023-08-24
Supplement: fig1-figsupp1-data1 [file Figure 1–Figure Supplement 1–Source Data 1.xlsx]

## Sheet: Sheet1
Figure 1-figure supplement 1. Histological identification of patients and mice with bone metastases and effects of MLO-Y4 and MC3T3-E1 on proliferation and migration of NSCLC cells.
e. Transwell assays were performed to evaluate the effects of MLO-Y4 cells or MC3T3-E1 cells on the migration of A549 cells in the co-culture system.
	Control	Co-MLO-Y4	Co-MC3T3-E1
#1	99	112	311
#2	91	130	260
#3	84	162	376
#4	51	93	322
#5	68	178	296
#6	96	129	357
f. CCK-8 assays were performed to evaluate the effects of MLO-Y4 cells or MC3T3-E1 cells on the proliferation of NCI-H23 cells in the co-culture system.
	Control	Co-MLO-Y4	Co-MC3T3-E1
#1	0.87	0.669	1.009
#2	0.928	0.676	1
#3	0.8	0.689	0.895
#4	0.862	0.763	0.965
#5	0.949	0.75	0.872
#6	0.957	0.704	0.989
g. CCK-8 assays were performed to evaluate the effects of MLO-A5 cells on the proliferation of A549 and NCI-H23 cells in the co-culture system.
	Control						Co-MLO-A5
	#1	#2	#3	#4	#5	#6	#1	#2	#3	#4	#5	#6
A549	1.43	1.63	1.588	1.397	1.415	1.469	0.904	0.968	1.063	0.901	1.001	0.917
NCI-H23	1.061	1.022	0.814	1.002	0.824	0.909	0.686	0.827	0.691	0.871	0.668	0.705
