# Supplementary material for: Mechanically stimulated osteocytes maintain tumor dormancy in bone metastasis of non-small cell lung cancer by releasing small extracellular vesicles
Source: eLife journal article supplement (doi:10.7554/elife.89613), 2023-08-24
Supplement: fig2-data1 [file Figure 2–Source Data 1.xlsx]

## Sheet: Sheet1
Figure 2. Osteocytes sEVs inhibits the proliferation of NSCLC cells.
b. CCK-8 assays were performed to evaluate the effect of sEVs on the proliferation of A549 cells.
	Control				MC3T3-sEVs				MLO-Y4-sEVs
	#1	#2	#3	#4	#1	#2	#3	#4	#1	#2	#3	#4
24h	0.372	0.408	0.384	0.418	0.413	0.416	0.409	0.42	0.371	0.338	0.377	0.379
48h	1.115	1.302	1.314	1.374	1.386	1.335	1.272	1.242	0.751	0.82	0.846	0.836
72h	1.988	2.503	2.557	2.284	2.063	2.194	2.345	2.553	1.164	1.236	1.317	1.311
96h	3.026	3.377	3.289	3.28	2.795	3.232	3.117	3.24	1.544	1.677	1.733	1.549
b. CCK-8 assays were performed to evaluate the effect of sEVs on the proliferation of NCI-H23 cells.
	Control				MC3T3-sEVs				MLO-Y4-sEVs
	#1	#2	#3	#4	#1	#2	#3	#4	#1	#2	#3	#4
24h	0.372	0.408	0.384	0.418	0.413	0.416	0.409	0.42	0.371	0.338	0.377	0.379
48h	1.115	1.302	1.314	1.374	1.386	1.335	1.272	1.242	0.751	0.82	0.846	0.836
72h	1.988	2.503	2.557	2.284	2.063	2.194	2.345	2.553	1.164	1.236	1.317	1.311
96h	3.026	3.377	3.289	3.28	2.795	3.232	3.117	3.24	1.544	1.677	1.733	1.549
d. Quantifications of Western blot.
	MLO-Y4-sEVs			MLO-Y4-sEVs(GW4869)
	#1	#2	#3	#1	#2	#3
CD63	1.07	1.21	0.92	0.08	0.03	0.12
TSG101	0.97	1.12	0.83	0.31	0.24	0.17
ALIX	0.95	1.09	0.89	0.26	0.1	0.13
e. The concentration of the sEVs were detected by NanoSight Analysis.
	MLO-Y4-sEVs	MLO-Y4-sEVs(GW4869)
#1	6.34	0.29
#2	4.89	0.71
#3	4.61	0.46
f. CCK-8 assays were performed to evaluate the rescue effect of GW4869 on the proliferation of A549 cells co-cultured with MLO-Y4 cells.
	Control				CO-MLO-Y4				CO-MLO-Y4(GW4869)
	#1	#2	#3	#4	#1	#2	#3	#4	#1	#2	#3	#4
24h	0.38	0.367	0.373	0.395	0.358	0.397	0.385	0.377	0.335	0.349	0.388	0.368
48h	1.142	1.103	1.085	1.218	0.799	0.718	0.747	0.859	1.067	1.134	1.225	1.248
72h	2.082	2.125	2.154	2.186	1.272	1.161	1.335	1.402	1.84	1.901	1.917	1.985
96h	2.881	3.104	3.321	2.927	1.67	1.551	1.499	1.785	2.861	2.775	2.796	2.68
f. CCK-8 assays were performed to evaluate the rescue effect of GW4869 on the proliferation of NCI-H23 cells co-cultured with MLO-Y4 cells.
	Control				CO-MLO-Y4				CO-MLO-Y4(GW4869)
	#1	#2	#3	#4	#1	#2	#3	#4	#1	#2	#3	#4
24h	0.462	0.447	0.467	0.438	0.314	0.315	0.365	0.366	0.438	0.446	0.442	0.431
48h	0.551	0.557	0.566	0.57	0.363	0.359	0.387	0.359	0.556	0.591	0.522	0.539
72h	0.757	0.753	0.704	0.7	0.405	0.47	0.478	0.467	0.638	0.636	0.64	0.649
96h	1.09	1.068	1.022	0.991	0.522	0.501	0.581	0.668	0.862	0.882	0.948	1.012
