# Supplementary material for: Mechanically stimulated osteocytes maintain tumor dormancy in bone metastasis of non-small cell lung cancer by releasing small extracellular vesicles
Source: eLife journal article supplement (doi:10.7554/elife.89613), 2023-08-24
Supplement: fig2-figsupp1-data1 [file Figure 2–Figure Supplement 1–Source Data 1.xlsx]

## Sheet: Sheet1
Figure 2-figure supplement 1. Identification of MLO-Y4-sEVs and MC3T3-E1-sEVs and their effects on the proliferation ability of NSCLC cells.
e. CCK-8 assays were performed to evaluate the effects of the components of the MLO-Y4 cells culture medium on the proliferation of A549 cells.
	Control	CM	SF	IEVs	sEVs
#1	1.928	1.04	1.833	2.042	1.21
#2	2.023	0.932	1.744	2.002	1.191
#3	1.945	1.084	1.863	1.952	1.185
#4	2.094	0.965	1.829	1.962	1.082
#5	2.045	0.907	1.923	1.902	1.186
#6	1.974	0.988	1.976	2.098	1.102
f. CCK-8 assays were performed to evaluate the effects of the components of the MLO-Y4 cells culture medium on the proliferation of NCI-H23 cells.
	Control	CM	SF	IEVs	sEVs
#1	0.783	0.494	0.65	0.704	0.604
#2	0.789	0.559	0.751	0.735	0.438
#3	0.731	0.456	0.733	0.76	0.408
#4	0.751	0.46	0.613	0.805	0.52
#5	0.828	0.568	0.621	0.733	0.534
#6	0.855	0.426	0.626	0.784	0.438
g. CCK-8 assays were performed to evaluate the effect of MLO-Y4-sEVs or bone marrow-sEVs on the proliferation of A549 cells.
	Control	MLO-Y4-sEVs	Bone marrow-sEVs
#1	1.869	1.238	2.431
#2	1.832	1.298	2.443
#3	1.904	1.259	2.267
#4	1.933	1.304	2.384
#5	1.939	1.402	2.24
#6	1.969	1.227	2.264
h. CCK-8 assays were performed to evaluate the effect of MLO-Y4-sEVs or bone marrow-sEVs on the proliferation of NCI-H23 cells.
	Control	MLO-Y4-sEVs	Bone marrow-sEVs
#1	1.334	0.611	1.534
#2	1.47	0.527	1.781
#3	1.23	0.709	1.531
#4	1.323	0.532	1.662
#5	1.271	0.56	1.596
#6	1.241	0.576	1.66
