# Supplementary material for: Mechanically stimulated osteocytes maintain tumor dormancy in bone metastasis of non-small cell lung cancer by releasing small extracellular vesicles
Source: eLife journal article supplement (doi:10.7554/elife.89613), 2023-08-24
Supplement: fig3-data1 [file Figure 3–Source Data 1.xlsx]

## Sheet: Sheet1
Figure 3. Osteocyte sEVs miR-99b-3p inhibits the proliferation of NSCLC cells by directly targeting MDM2.
a. Comparison of relative miR-365-1-5p, miR-99b-3p, miR-193a-5p, miR-125a-3p, miR-690, miR-1195, miR-122-5p, miR-140-3p content between MLO-Y4-sEVs and MC3T3-E1-sEVs by qRT-PCR.
	MC3T3-E1-sEVs			MLO-Y4-sEVs
	#1	#2	#3	#1	#2	#3
miR-365-1-5p	1.19	0.65	1.28	8.6	8.42	5.53
miR-99b-3p	1.1	0.77	1.21	14.79	19.5	14.46
miR-193a-5p	0.99	1.25	1.11	3.06	4.83	4.59
miR-125a-3p	1.03	0.85	1.28	1.34	2.4	1.4
miR-690	1.21	0.69	1.23	1.16	1.04	0.84
miR-1195	1.29	0.76	1.18	0.59	1.06	0.55
miR-122-5p	1.3	1.15	0.88	0.17	0.15	0.12
miR-140-3p	0.75	1.23	1.14	0.07	0.03	0.04
b. A549 cells were transfected with miR-365a-5p, miR-30c-1-3p, miR-193a-5p, miR-99b-3p mimics, or NC (negative control) in DMEM medium. 48 hours later, CCK-8 assays were performed.
	Control	miR-365a-5p	miR-30c-1-3p	miR-193a-5p	miR-99b-3p
#1	2.011	1.947	2.202	1.601	1.422
#2	2.012	1.801	2.036	1.805	1.582
#3	2.17	1.84	2.026	1.793	1.58
#4	2.073	1.909	2.068	1.635	1.584
#5	2.185	1.963	2.009	1.758	1.607
#6	2.113	1.916	2.011	1.712	1.46
b. NCI-H23 cells were transfected with miR-365a-5p, miR-30c-1-3p, miR-193a-5p, miR-99b-3p mimics, or NC (negative control) in DMEM medium. 48 hours later, CCK-8 assays were performed.
	Control	miR-365a-5p	miR-30c-1-3p	miR-193a-5p	miR-99b-3p
#1	0.836	0.657	0.726	0.61	0.402
#2	0.754	0.805	0.798	0.641	0.469
#3	0.776	0.72	0.78	0.626	0.511
#4	0.809	0.659	0.832	0.568	0.48
#5	0.809	0.792	0.77	0.587	0.489
#6	0.807	0.616	0.805	0.594	0.482
c. CCK-8 assays were performed at different points in time after transfection of A549 cells.
	NC mimics						miR-99b-3p mimics						NC inhibitor						miR-99b-3p inhibitor
	#1	#2	#3	#4	#5	#6	#1	#2	#3	#4	#5	#6	#1	#2	#3	#4	#5	#6	#1	#2	#3	#4	#5	#6
24h	0.419	0.386	0.412	0.431	0.434	0.45	0.419	0.405	0.41	0.433	0.483	0.451	0.405	0.391	0.412	0.433	0.462	0.457	0.39	0.399	0.41	0.414	0.457	0.473
48h	0.608	0.592	0.609	0.576	0.644	0.551	0.487	0.467	0.498	0.48	0.494	0.47	0.778	0.606	0.598	0.58	0.597	0.561	0.67	0.678	0.687	0.661	0.719	0.591
72h	1.084	1.056	1.082	1.047	1.12	1.044	0.815	0.802	1.047	0.782	0.838	0.762	1.155	1.065	1.113	1.039	1.113	1.065	1.252	1.411	1.253	1.208	1.247	1.209
96h	1.398	1.496	1.551	1.428	1.405	1.397	1.034	1.084	1.112	1.132	1.14	1.105	1.408	1.403	1.36	1.496	1.486	1.48	1.6	1.68	1.573	1.749	1.648	1.735
c. CCK-8 assays were performed at different points in time after transfection of NCI-H23 cells.
	NC mimics						miR-99b-3p mimics						NC inhibitor						miR-99b-3p inhibitor
	#1	#2	#3	#4	#5	#6	#1	#2	#3	#4	#5	#6	#1	#2	#3	#4	#5	#6	#1	#2	#3	#4	#5	#6
24h	0.631	0.608	0.575	0.605	0.589	0.607	0.505	0.481	0.465	0.46	0.393	0.496	0.529	0.552	0.542	0.53	0.534	0.56	0.624	0.642	0.673	0.631	0.622	0.678
48h	1.224	1.082	1.106	1.079	1.159	1.115	0.994	0.826	0.879	0.906	0.915	0.868	1.008	1.031	0.961	1.061	1.058	1.008	1.395	1.257	1.327	1.192	1.26	1.223
72h	1.857	1.655	1.742	1.616	1.689	1.665	1.378	1.284	1.203	1.177	1.127	1.041	1.566	1.354	1.507	1.473	1.639	1.793	2.039	1.803	1.825	1.913	1.865	1.956
96h	2.119	1.948	1.98	1.865	2.038	2.313	1.649	1.45	1.599	1.46	1.426	1.619	2.12	2.194	1.861	1.953	1.946	2.001	2.479	2.149	2.135	2.273	2.244	2.272
e. Relative luciferase activities of wild-type (WT) or mutant (MUT) MDM2 3′-UTRs were determined in A549 cells, which were co-transfected with the miR-99b-3p mimics or negative control.
	NC				miR-99b-3p
	#1	#2	#3	#4	#1	#2	#3	#4
WT	1.1414	1.0398	0.9924	0.9408	0.5628	0.607	0.5531	0.6312
MUT	1.1905	1.0742	1.0105	1.0412	1.0394	0.9958	1.002	0.9786
f. MDM2 protein in A549 cells were analyzed by Western blot 72 hours after transfection.
	NC mimics	miR-99b-3p mimics	NC inhibitor	miR-99b-3p inhibitor
#1	0.957	0.292	1.114	2.235
#2	1.019	0.45	0.946	1.95
#3	0.838	0.368	1.046	2.073
