# Supplementary material for: Mechanically stimulated osteocytes maintain tumor dormancy in bone metastasis of non-small cell lung cancer by releasing small extracellular vesicles
Source: eLife journal article supplement (doi:10.7554/elife.89613), 2023-08-24
Supplement: fig3-figsupp1-data1 [file Figure 3–Figure Supplement 1–Source Data 1.xlsx]

## Sheet: Sheet1
Figure 3-figure supplement 1. The miRNA profiles of MLO-Y4-sEVs and MC3T3-E1-sEVs and distribution of miR-99b-3p in bone metastases tissues of NSCLC patients.
a. The heat map shows differentially expressed miRNAs in sEVs at least 1.5-fold difference between MLO-Y4-sEVs and MC3T3-E1-sEVs identified by microarray.
	MC3T3-E1-sEVs	MLO-Y4-sEVs
mmu-miR-365-1-5p	1	511.53
mmu-miR-1195	1	235.226
mmu-miR-690	1	89.1302
mmu-miR-30c-1-3p	1	69.7541
mmu-miR-466i-5p	1	48.9939
mmu-miR-10a-3p	1	37.7835
mmu-miR-193a-5p	1	37.7835
mmu-miR-3473b	1	30.033
mmu-miR-3473e	1	25.189
mmu-miR-5106	1	23.2514
mmu-miR-5126	1	22.0888
mmu-miR-5128	1	21.0715
mmu-miR-99b-3p	1	16.3834
mmu-miR-615-3p	1	16.3043
mmu-miR-125a-3p	1	15.9853
mmu-miR-6240	1	15.5009
mmu-miR-129-5p	1	14.5321
mmu-miR-5119	1	11.0586
mmu-miR-96-5p	1	10.7953
mmu-miR-9-5p	1	10.0756
mmu-miR-195a-3p	1	9.88183
mmu-miR-23a-5p	1	8.39632
mmu-miR-183-5p	1	8.17739
mmu-miR-221-5p	1	8.13798
mmu-miR-27b-5p	1	8.13798
mmu-miR-361-3p	1	7.02385
mmu-miR-708-3p	1	6.25998
mmu-miR-429-3p	1	5.61908
mmu-miR-200a-5p	1	5.44954
mmu-miR-381-3p	1	5.15323
mmu-miR-10a-5p	1	5.09604
mmu-miR-182-5p	1	5.05361
mmu-miR-146a-5p	1	4.93416
mmu-miR-1a-3p	1	4.92365
mmu-miR-10b-5p	1	4.69111
mmu-miR-451a	1	4.51192
mmu-miR-22-3p	1	0.39729
mmu-miR-22-5p	1	0.368338
mmu-miR-484	1	0.347612
mmu-miR-143-3p	1	0.31385
mmu-let-7d-5p	1	0.284786
mmu-miR-365-3p	1	0.249122
mmu-miR-15b-5p	1	0.247941
mmu-miR-21a-5p	1	0.244629
mmu-miR-146b-5p	1	0.240947
mmu-miR-19b-3p	1	0.217982
mmu-miR-574-5p	1	0.21061
mmu-miR-214-3p	1	0.196096
mmu-miR-322-5p	1	0.161468
mmu-miR-421-3p	1	0.138401
mmu-miR-140-3p	1	0.105229
mmu-miR-140-5p	1	0.0883602
mmu-miR-6239	1	0.0683864
mmu-miR-122-5p	1	0.0582741
