# Supplementary material for: Mechanically stimulated osteocytes maintain tumor dormancy in bone metastasis of non-small cell lung cancer by releasing small extracellular vesicles
Source: eLife journal article supplement (doi:10.7554/elife.89613), 2023-08-24
Supplement: fig4-data1 [file Figure 4–Source Data 1.xlsx]

## Sheet: Sheet1
Figure 4. Mechanical stimulation increased the release of sEVs from osteocytes and enhanced inhibitory effect of osteocytes on the proliferation of NSCLC cells
a. CCK-8 assays were performed to evaluate the effect of sEVs on the proliferation of A549 cells.
	Control						Static MLO-Y4-sEVs						Mechanically stimulated MLO-Y4-sEVs
	#1	#2	#3	#4	#5	#6	#1	#2	#3	#4	#5	#6	#1	#2	#3	#4	#5	#6
24h	1.026	1.173	1.091	0.937	0.97	1.006	0.95	0.947	0.826	0.789	0.792	0.96	0.876	0.867	0.859	0.842	0.866	0.99
48h	1.313	1.38	1.305	1.254	1.222	1.403	1.17	1.151	1.266	1.153	1.031	1.176	1.091	1.023	0.97	0.967	0.995	1.11
72h	2.228	2.296	2.148	2.098	2.303	2.125	1.685	1.615	1.69	1.603	1.756	1.592	1.247	1.431	1.253	1.394	1.201	1.391
96h	2.962	3.034	3.161	3.029	3.215	3.011	2.288	2.422	2.34	2.25	2.19	2.257	1.654	1.791	1.807	1.713	1.725	1.693
c. Western blot analysis of the typical sEVs markers CD63, TSG101, and Alix.
	Static MLO-Y4-sEVs			Mechanically stimulated MLO-Y4-sEVs
	#1	#2	#3	#1	#2	#3
CD63	1.05	1.21	0.93	8.81	5.94	6.21
TSG101	1.12	1.17	0.83	11.59	10.44	9.9
ALIX	1.09	1.14	0.91	6.95	9.13	8.37
d. Concentration of sEVs was detected by NanoSight analysis.
	Static MLO-Y4-sEVs	Mechanically stimulated MLO-Y4-sEVs
#1	1.6	5.49
#2	0.93	3.12
#3	1.25	4.63
e. qRT-PCR identification of miR-99b-3p in sEVs.
	Static MLO-Y4-sEVs	Mechanically stimulated MLO-Y4-sEVs
#1	0.850756	5.3176
#2	0.844567	6.58922
#3	1.39175	7.31289
f. Quantification of the number of Ki-67-positive cells in immunofluorescence staining images.
	Control	Tibial loading
#1	125	63
#2	182	79
#3	120	55
#4	106	92
#5	151	39
#6	164	87
g. Quantitative data of bone/total volume was obtained from micro-CT analysis.
	Control	Tibial loading
#1	19.69	19.67
#2	18.33	23.01
#3	13.23	25.3
#4	17.88	27.24
#5	16.33	28.02
#6	11.54	20.4
