# Supplementary material for: Mechanically stimulated osteocytes maintain tumor dormancy in bone metastasis of non-small cell lung cancer by releasing small extracellular vesicles
Source: eLife journal article supplement (doi:10.7554/elife.89613), 2023-08-24
Supplement: fig4-figsupp1-data1 [file Figure 4–Figure Supplement 1–Source Data 1.xlsx]

## Sheet: Sheet1
Figure 4-figure supplement 1. Mechanical loading increased the release of sEVs from osteocytes and enhanced inhibitory effect of osteocytes on the proliferation of NSCLC cells.
a. CCK-8 assays were performed to evaluate the effect of sEVs on the proliferation of NCI-H23 cells.
	Control						Static MLO-Y4-sEVs
	#1	#2	#3	#4	#5	#6	#1	#2	#3	#4	#5	#6
24h	0.646	0.633	0.675	0.623	0.666	0.633	0.686	0.662	0.633	0.706	0.634	0.67
48h	0.927	0.949	0.879	0.954	0.87	0.935	0.814	0.844	0.851	0.831	0.848	0.838
72h	1.337	1.363	1.383	1.34	1.403	1.377	1.053	1.089	1.047	1.012	1.031	1.046
96h	1.736	1.802	1.722	1.738	1.714	1.802	1.343	1.318	1.341	1.302	1.32	1.324
c. CCK-8 assays were performed to evaluate the effects of the components of the static or mechanically stimulated MLO-Y4 cells culture medium on the proliferation of A549 cells.
	Static-MLO-Y4						Mechanically stimulated MLO-Y4
CM	2.069	1.919	2.15	1.95	1.855	1.926	1.296	1.221	1.234	1.338	1.369	1.182
SF	1.994	1.952	2.042	1.844	1.951	2.122	1.64	1.888	1.701	1.776	1.827	1.74
lEVs	1.933	1.811	2.066	1.925	1.905	1.878	2.028	1.933	2.124	2.012	1.996	1.887
sEVs	1.934	1.909	2.178	1.915	2.077	1.882	1.326	1.322	1.258	1.257	1.297	1.155
d. CCK-8 assays were performed to evaluate the effects of the components of the static or mechanically stimulated MLO-Y4 cells culture medium on the proliferation of NCI-H23 cells.
	Static-MLO-Y4						Mechanically stimulated MLO-Y4
CM	1.534	1.438	1.356	1.529	1.425	1.323	0.784	0.755	0.676	0.765	0.622	0.63
SF	1.407	1.556	1.413	1.284	1.272	1.49	1.249	1.143	1.12	1.206	1.176	1.149
lEVs	1.423	1.447	1.258	1.474	1.581	1.287	1.252	1.487	1.215	1.395	1.229	1.221
sEVs	1.594	1.44	1.215	1.305	1.462	1.289	0.663	0.616	0.516	0.72	0.669	0.785
e. Representative immunofluorescence staining images of GFP (green), CCND3 (red), and DAPI (blue) in the tibia of mice with bone metastases and quantification of the GFP and CCND3 positive cells.
	Control	Tibial loading
#1	161	5
#2	213	51
#3	169	16
#4	218	23
#5	185	63
#6	197	9
f. Quantitative data of cortical bone thickness was obtained from micro-CT analysis.
	Control	Tibial loading
#1	324	410
#2	402	406
#3	351	372
#4	378	417
#5	392	379
#6	369	431
f. Quantitative data of trabecular bone thickness was obtained from micro-CT analysis.
	Control	Tibial loading
#1	59	93
#2	70	104
#3	77	73
#4	78	97
#5	81	84
#6	63	74
g. Representative immunofluorescence staining images of GFP (green), CCND3 (red), and DAPI (blue) in the tibia of mice with bone metastases and quantification of the GFP and CCND3 positive cells.
	Tibial loading+AntagomiR-NC	Tibial loading+AntagomiR-494-3p
#1	5	109
#2	39	143
#3	16	60
#4	53	115
#5	21	125
#6	17	92
h. Quantitative data of cortical bone thickness was obtained from micro-CT analysis.
	Tibial loading+AntagomiR-NC	Tibial loading+AntagomiR-494-3p
#1	392	358
#2	414	320
#3	386	347
#4	405	371
#5	373	363
#6	403	341
h. Quantitative data of trabecular bone thickness was obtained from micro-CT analysis.
	Tibial loading+AntagomiR-NC	Tibial loading+AntagomiR-494-3p
#1	70	57
#2	116	66
#3	105	50
#4	79	57
#5	110	81
#6	90	70
