# Supplementary material for: Mechanically stimulated osteocytes maintain tumor dormancy in bone metastasis of non-small cell lung cancer by releasing small extracellular vesicles
Source: eLife journal article supplement (doi:10.7554/elife.89613), 2023-08-24
Supplement: fig5-data1 [file Figure 5–Source Data 1.xlsx]

## Sheet: Sheet1
Figure 5. Moderate exercise combined with zoledronic acid effectively suppressed the progression of bone metastasis of NSCLC.
a. Quantification of biophotonic images of fluorescence signal in hindlimb bones of mice.
	Control	ZA	Treadmill running	Treadmill running+ZA
#1	19.31	13.63	20.31	14.72
#2	27.89	19.1	16.03	11.24
#3	26.39	20.09	14.14	6.28
#4	18.7	12.59	16.7	7.32
#5	22.84	15.07	22.21	9.44
#6	25.2	18.22	17.61	8.88
b. Quantification of the number of Ki-67-positive cells in immunofluorescence staining images.
	Control	ZA	Treadmill running	Treadmill running+ZA
#1	160	81	150	39
#2	243	108	182	48
#3	177	83	163	90
#4	181	124	136	56
#5	213	186	113	85
#6	227	148	98	71
c. Quantitative data of bone/total volume was obtained from micro-CT analysis.
	Control	ZA	Treadmill running	Treadmill running+ZA
#1	9.55	18.5	17.98	26.05
#2	12.65	20.43	21.77	27.34
#3	16.04	26.96	24.85	33.14
#4	9.37	27.44	20.63	31.34
#5	10.8	16.28	19.87	20.91
#6	17.38	21.59	15.04	35.14
c. Quantitative data of cortical bone thickness was obtained from micro-CT analysis.
	Control	ZA	Treadmill running	Treadmill running+ZA
#1	301	397	436	438
#2	340	415	416	487
#3	291	425	338	457
#4	264	432	394	475
#5	357	379	353	417
#6	349	344	366	513
c. Quantitative data of trabecular bone thickness was obtained from micro-CT analysis.
	Control	ZA	Treadmill running	Treadmill running+ZA
#1	59	76	92	112
#2	60	84	102	122
#3	64	91	106	127
#4	72	93	114	131
#5	73	106	117	139
#6	80	108	118	142
