# Supplementary material for: Mechanically stimulated osteocytes maintain tumor dormancy in bone metastasis of non-small cell lung cancer by releasing small extracellular vesicles
Source: eLife journal article supplement (doi:10.7554/elife.89613), 2023-08-24
Supplement: fig5-figsupp1-data1 [file Figure 5–Figure Supplement 1–Source Data 1.xlsx]

## Sheet: Sheet1
Figure 5-figure supplement 1. Moderate exercise combined with zoledronic acid effectively suppressed the progression of bone metastasis of NSCLC.
Representative immunofluorescence staining images of GFP (green), CCND3 (red), and DAPI (blue) in the tibia of mice with bone metastases and quantification of the GFP and CCND3 positive cells.
	Control	ZA	Treadmill running	Treadmill running+ZA
#1	196	79	148	33
#2	209	96	127	36
#3	208	102	87	10
#4	162	123	140	30
#5	201	69	78	24
#6	172	99	87	11
