# Supplementary material for: Mechanically stimulated osteocytes maintain tumor dormancy in bone metastasis of non-small cell lung cancer by releasing small extracellular vesicles
Source: eLife journal article supplement (doi:10.7554/elife.89613), 2023-08-24
Supplement: fig6-data1 [file Figure 6–Source Data 1.xlsx]

## Sheet: Sheet1
Figure 6. Exercise preconditioning effectively suppressed the progression of bone metastasis of NSCLC.
a. Quantification of biophotonic images of fluorescence signal in hindlimb bones of mice.
	Control						Exercise preconditioning						Treadmill running
	#1	#2	#3	#4	#5	#6	#1	#2	#3	#4	#5	#6	#1	#2	#3	#4	#5	#6
LLC	13.87	21.41	20.12	15.63	18.81	17.9	9.61	2.24	11.37	8.26	5.11	6.29	12.38	8.75	17.33	11.02	9.36	17.08
A549	13.55	13.03	20.6	18.97	17.08	14.28	7.54	0.69	9.15	6.43	4.17	0.5	5.22	12.19	8.18	13.49	10.97	7.08
b. Quantification of the number of Ki-67-positive cells in immunofluorescence staining images.
	Control						Exercise preconditioning						Treadmill running
	#1	#2	#3	#4	#5	#6	#1	#2	#3	#4	#5	#6	#1	#2	#3	#4	#5	#6
LLC	220	172	140	189	155	191	63	35	57	51	43	34	77	49	66	41	65	90
A549	111	128	109	83	88	132	9	6	22	16	13	30	25	48	30	54	57	43
c. Quantitative data of bone/total volume was obtained from micro-CT analysis.
	Control						Exercise preconditioning						Treadmill running
	#1	#2	#3	#4	#5	#6	#1	#2	#3	#4	#5	#6	#1	#2	#3	#4	#5	#6
LLC	16.55	20.86	18.8	13.21	10.18	24.92	40.27	39.09	31.22	45.54	38.77	48.85	22.21	33.47	25.71	17.91	30.18	29.3
A549	17.76	30.82	27.8	24.99	19.55	16.61	51.88	36.96	43.79	48.95	52.43	37.2	27.77	37.28	34.31	30.97	32.51	43.09
c. Quantitative data of cortical bone thickness was obtained from micro-CT analysis.
	Control						Exercise preconditioning						Treadmill running
	#1	#2	#3	#4	#5	#6	#1	#2	#3	#4	#5	#6	#1	#2	#3	#4	#5	#6
LLC	262	334	344	284	338	254	440	537	514	482	465	398	427	361	451	371	347	297
A549	256	399	322	266	347	374	488	494	592	574	501	467	355	435	449	424	392	387
c. Quantitative data of trabecular bone thickness was obtained from micro-CT analysis.
	Control						Exercise preconditioning						Treadmill running
	#1	#2	#3	#4	#5	#6	#1	#2	#3	#4	#5	#6	#1	#2	#3	#4	#5	#6
LLC	78	51	61	75	78	50	123	144	158	102	160	145	102	109	91	93	85	106
A549	60	52	69	96	98	91	152	166	157	145	122	183	97	99	107	106	117	108
