# Supplementary material for: Mechanically stimulated osteocytes maintain tumor dormancy in bone metastasis of non-small cell lung cancer by releasing small extracellular vesicles
Source: eLife journal article supplement (doi:10.7554/elife.89613), 2023-08-24
Supplement: fig6-figsupp1-data1 [file Figure 6–Figure Supplement 1–Source Data 1.xlsx]

## Sheet: Sheet1
Figure 6-figure supplement 1. Exercise preconditioning effectively suppressed the progression of bone metastasis of NSCLC.
b. Representative immunofluorescence staining images of GFP (green), CCND3 (red), and DAPI (blue) in the tibia of mice with bone metastases and quantification of the GFP and CCND3 positive cells.
	Control						Exercise preconditioning						Treadmill running
	#1	#2	#3	#4	#5	#6	#1	#2	#3	#4	#5	#6	#1	#2	#3	#4	#5	#6
LLC	132	194	196	207	174	191	18	3	15	9	10	12	39	51	79	68	42	25
A549	187	146	185	150	165	130	6	15	11	18	6	5	40	27	52	8	41	49
